# Hybrid systems approach to modeling stochastic dynamics of cell size

Cesar Augusto Vargas-Garcia<sup>1</sup>, Abhyudai Singh<sup>2</sup>

**Abstract**—A ubiquitous feature of all living cells is their growth over time followed by division into two daughter cells. How a population of genetically identical cells maintains size homeostasis, i.e., a narrow distribution of cell size, is an intriguing fundamental problem. We model size using a stochastic hybrid system, where a cell grows exponentially over time and probabilistic division events are triggered at discrete time intervals. Moreover, whenever these events occur, size is randomly partitioned among daughter cells. We first consider a scenario, where a timer (i.e., cell-cycle clock) that measures the time since the last division event regulates cellular growth and the rate of cell division. Analysis reveals that such a timer-driven system cannot achieve size homeostasis, in the sense that, the cell-to-cell size variation grows unboundedly with time. To explore biologically meaningful mechanisms for controlling size we consider three different classes of models: i) a size-dependent growth rate and timer-dependent division rate; ii) a constant growth rate and size-dependent division rate and iii) a constant growth rate and division rate that depends both on the cell size and timer. We show that each of these strategies can potentially achieve bounded intercellular size variation, and derive closed-form expressions for this variation in terms of underlying model parameters. Finally, we discuss how different organisms have adopted the above strategies for maintaining cell size homeostasis.

## I. INTRODUCTION

Stochastic hybrid systems (SHS) constitute an important mathematical modeling framework that combines continuous dynamics with discrete stochastic events. SHS are increasingly being used to study noise and uncertainty not only in engineering systems [1]–[10], but also in life science applications [11]–[18]. Here we use SHS to model a universal feature of all living cells: growth in cell size (volume) over time and division into two viable progenies (daughters). A key question is how cells regulate their growth and timing of division to ensure that they do not get abnormally large (or small). This problem has been referred to literature as *size homeostasis* [19]–[32], and is a vigorous area of current experimental research in organisms ranging from bacteria [28], [32], algae [33], [34], yeast [35] and mammalian cells [36], [37]. We investigate if phenomenological models of cell size dynamics based on SHS can provide insights into the control mechanisms needed for size homeostasis.

The proposed model consists of two state variables:  $V(t)$ , the size of an individual cell at time  $t$ , and a timer  $\tau$  that measures the time elapsed from when the cell was born

(i.e., last cell division event). This timer can be biologically interpreted as an internal clock that regulates cell-cycle processes. Time evolution of these variables is governed by the ordinary differential equations

$$\dot{V} = \alpha(V, \tau)V, \quad \dot{\tau} = 1, \quad (1)$$

where  $\alpha(V, \tau)$  denotes the *growth rate* that can potentially depend on both the cell size and timer. A constant  $\alpha$  implies exponential growth over time. Cell division events occur at discrete time intervals with *division rate*  $f(V, \tau)$ . In the stochastic formulation, the probability that the cell will divide in the next infinitesimal time interval  $(t, t + dt)$  is given by  $f(V, \tau)dt$ . Moreover, whenever a division event is triggered, the timer is reset to zero and the size is reduced to  $\beta V$ , where  $\beta \in (0, 1)$  is a random variable following a beta distribution. Assuming symmetric division,  $\beta$  is on average half, and its variance quantifies the error in partitioning of volume between daughters. The overall SHS model is illustrate in Fig. 1 and incorporates two important noise sources: randomness in timing of division and partitioning.

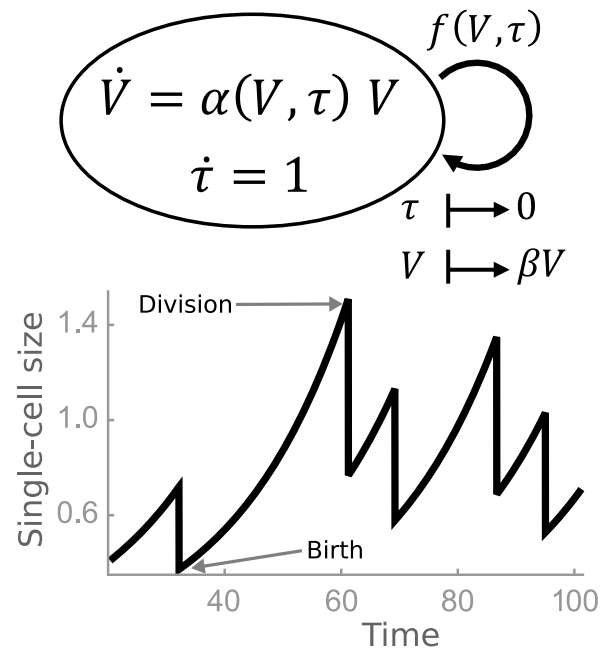

Fig. 1. SHS model for capturing time evolution of cell size. The size of single cell  $V(t)$  grows exponentially with growth rate  $\alpha(V, \tau)$ , where  $\tau$  represents a cell-cycle clock that measures the time since the last division event. Cell division occurs at rate  $f(V, \tau)$ , which resets  $\tau$  to zero, and divides the size into half. Partitioning errors in size are quantified using the random variable  $\beta$ . A sample trajectory of  $V(t)$  is shown with cycles of growth and division.

<sup>1</sup>C. Vargas is with Department of Electrical and Computer Engineering, University of Delaware, Newark, DE USA 19716. [cavargar@udel.edu](mailto:cavargar@udel.edu)

<sup>2</sup>A. Singh is with the Department of Electrical and Computer Engineering, Biomedical Engineering, Mathematical Sciences, Center for Bioinformatics and Computational Biology, University of Delaware, Newark, DE USA 19716. [absingh@udel.edu](mailto:absingh@udel.edu)

Depending on the functional forms of  $f$  and  $\alpha$ , we consider four different strategies to control size:

- 1) *Timer controlled system*: Both the growth and division rates are functions of  $\tau$  only.
- 2) *Size dependent growth*: Growth rate  $\alpha(V)$  is a function of size and the division rate  $f(\tau)$  is timer controlled.
- 3) *Size dependent division*: Constant growth rate and division rate  $f(V)$  is a function of size.
- 4) *Size and timer dependent division*: Constant growth rate and division rate  $f(V, \tau)$  that depends on both variables.

Our key contribution is to show that the first strategy of a timer controlled growth and division is not physiologically meaningful, in the sense that, the variance in cell size becomes arbitrarily large for a given mean cell size. Hence, size-controlled growth and/or division is a key requirement of size homeostasis. Analysis reveals that remaining strategies (i.e., 2 – 4 above) can result in bounded cell size variance, and we study how this variance is impacted by different noise sources. In some cases, exact analytical formulas for the first and second order moments of the cell size are derived in terms of model parameters. When exact solutions are not available, approximation moment closure methods are used to investigate cell size statistics. Finally, we discuss how diverse organisms have adopted these different strategies (or a combination of them) to achieve size homeostasis.

## II. TIMER DEPENDENT GROWTH AND DIVISION

We begin by considering a scenario, where both the growth and division rates are arbitrary functions of  $\tau$ , but do not depend on  $V$ . Note that a constant growth/division rate would be a special case of this class of system. The SHS can be compactly written as

$$\dot{V} = \alpha(\tau)V, \quad \dot{\tau} = 1, \quad (2)$$

with reset maps

$$V \mapsto \beta V, \quad \tau \mapsto 0 \quad (3)$$

that are activated at the time of division. The probability that a cell division event will occur in the next infinitesimal time interval  $(t, t + dt)$  is given by  $f(\tau)dt$ , where  $f$  can be interpreted as a ‘‘hazard function’’ [38]. Let  $T_1, T_2, \dots$  denote independent and identically distributed (i.i.d.) random variables that represent the time interval between two successive division events. Then, based on the above formulation, the probability density function for  $T_i$  is given by

$$T_i \sim f(T_i)e^{-\int_{y=0}^{T_i} f(y)dy}, \quad \forall x \geq 0 \quad (4)$$

with mean duration  $\langle T_i \rangle$ , where the symbol  $\langle \cdot \rangle$  is used to denote the expected value of a random variable. Note that a constant division rate in (4) would lead to an exponentially distributed  $T_i$ . For this class of models, the steady-state statistics of  $V$  is given by the following theorem.

**Theorem 1:** Consider a newborn cell with size  $V_0$  born at time  $t = 0$ , and goes through cycles of growth and division as per the SHS (2)-(3). Then

$$\lim_{t \rightarrow \infty} \langle V(t) \rangle = \begin{cases} 0 & \langle e^{\int_{y=0}^{T_i} \alpha(y)dy} \rangle < 2 \\ \infty & \langle e^{\int_{y=0}^{T_i} \alpha(y)dy} \rangle > 2 \\ V_0 & \langle e^{\int_{y=0}^{T_i} \alpha(y)dy} \rangle = 2. \end{cases} \quad (5)$$

Moreover,

$$\lim_{t \rightarrow \infty} \langle V^2(t) \rangle = \infty \quad (6)$$

$$\text{when } \langle e^{\int_{y=0}^{T_i} \alpha(y)dy} \rangle = 2. \quad \blacksquare$$

**Proof of Theorem 1:** Let  $V_{i-1}$  denote the cell size just at the start of the  $i^{\text{th}}$  cell cycle. Using (2), the size at the time of division in the  $i^{\text{th}}$  cell cycle is given by

$$V_{i-1}e^{\int_{y=0}^{T_i} \alpha(y)dy}. \quad (7)$$

Thus, the size of the newborn cell in the next cycle is

$$V_i = V_{i-1}X_i, \quad X_i := \beta_i e^{\int_{y=0}^{T_i} \alpha(y)dy}, \quad (8)$$

where  $\beta_i \in (0, 1)$  are i.i.d random variables following a beta distribution and  $X_i$  are i.i.d. random variables that are a function of  $\beta_i$  and  $T_i$ . From (8), the mean cell size at the start of  $i^{\text{th}}$  cell cycle is given by

$$\langle V_i \rangle = V_0 \langle X_i \rangle^i \quad (9)$$

and will grow unboundedly over time if  $\langle X_i \rangle > 1$ , or go to zero if  $\langle X_i \rangle < 1$ . Using the fact that  $\langle \beta_i \rangle = 0.5$  (symmetric division of a mother cell into daughter cells),  $\beta_i$  and  $T_i$  are independent, (5) is a straightforward consequence of (9). It also follows from (8) that

$$\langle V_i^2 \rangle = V_0^2 \langle X_i^2 \rangle^i = V_0^2 \langle X_i \rangle^{2i} (1 + CV_{X_i}^2)^i \quad (10)$$

where  $CV_{X_i}^2$  represents the coefficient of variation squared of  $X_i$ . When  $\langle X_i \rangle = 1$ , i.e.,  $\langle e^{\int_{y=0}^{T_i} \alpha(y)dy} \rangle = 2$ , then  $\langle V_i \rangle = V_0$  and

$$\langle V_i^2 \rangle = V_0^2 (1 + CV_{X_i}^2)^i, \quad (11)$$

which results in (6).  $\blacksquare$

In summary, above results show the unless functions  $\alpha(\tau)$  and  $f(\tau)$  are chosen such that

$$\langle e^{\int_{y=0}^{T_i} \alpha(y)dy} \rangle = \int_{x=0}^{\infty} f(x) e^{\int_{y=0}^x (\alpha(y) - f(y))dy} dx = 2 \quad (12)$$

cell size would either grow unboundedly or go extinct. Moreover, in the case of a stable mean cell size, the statistical fluctuations in size would grow unboundedly. Hence, any regulation of growth and division rates using an internal cell-cycle clock will not lead to size homeostasis.

### III. SIZE-DEPENDENT GROWTH AND TIMER-DEPENDENT DIVISION

Recent work measuring sizes of single mammalian cells from their birth to division have found lowering of growth rates as cells become bigger [36], [37], [39]. These experimental studies suggest that size homeostasis in mammalian system relies on size-dependent regulation of growth rate. We explore what forms of such regulation will lead to bounded moments of  $V$ . Consider the following model

$$\dot{V} = \alpha(V)V, \quad \dot{\tau} = 1, \quad (13)$$

where growth rate is now size dependent and is a monotonically decreasing function with

$$\lim_{V \rightarrow \infty} \alpha(V) = 0. \quad (14)$$

We assume that  $\dot{V}$  in (13) is bounded, i.e.

$$\alpha(V)V \leq k_{max}, \quad \forall V \geq 0 \quad (15)$$

As before, division events occur with rate  $f(\tau)$  and inter-division times are given by  $T_i$  in (4). We further consider biologically meaningful functions  $f(\tau)$  that are monotonically increasing, i.e., probability of division increases as more time elapses since cell birth. The result below shows that if the growth rate for small cell size is large enough, then all moments of  $V$  remain bounded and converge to non-zero values.

**Theorem 2:** Let growth rate  $\alpha(V)$  satisfy (14)-(15) and  $\alpha_0 := \lim_{V \rightarrow 0} \alpha(V)$  be chosen such that

$$\langle e^{\alpha_0 T_i} \rangle > 2, \quad (16)$$

then

$$0 < \lim_{t \rightarrow \infty} \langle V(t) \rangle < 2k_{max} \langle T_i \rangle \quad (17)$$

$$\lim_{t \rightarrow \infty} \langle V^l(t) \rangle < \frac{\langle T_i \rangle k_{max}}{\langle 1 - \beta^l \rangle} \lim_{t \rightarrow \infty} \langle V^{l-1}(t) \rangle \quad (18)$$

where  $l \in \{2, 3, \dots\}$ ,  $\langle T_i \rangle$  is the mean cell-cycle duration, and  $\beta \in (0, 1)$  is a random variable quantifying the error in partitioning of volume between daughters. ■

**Proof of Theorem 2:** Consider a newborn cell with sufficiently small size born at time  $t = 0$ . Then, the mean cell size will grow in successive generation iff the second inequality in (5) is true for  $\alpha_0$ , which results in (16). In essence, (16) ensures that cell size will not go extinct. Next we show that the mean cell size is bounded from above.

Based on Dynkin's formula, the time evolution of statistical moments for the SHS (13) and (3) is given by

$$\begin{aligned} \frac{d\langle V^l \tau^n \rangle}{dt} &= \langle f(\tau) V^l \tau^n \rangle (\langle \beta^l \rangle - 1) \\ &+ \left\langle \frac{\partial V^l \tau^n}{\partial V} \alpha(V) V \right\rangle + \left\langle \frac{\partial V^l \tau^n}{\partial \tau} \right\rangle, \end{aligned} \quad (19)$$

for non-negative integers  $l$  and  $n$  [40]. The dynamics of the mean cell size is obtained by setting  $l = 1$  and  $n = 0$

$$\frac{d\langle V \rangle}{dt} = \langle \alpha(V) V \rangle - \frac{\langle f(\tau) V \rangle}{2}. \quad (20)$$

Using (15), the fact that  $\tau$  and  $V$  are positively correlated and  $f$  is a increasing function, the above equation reduces to the following inequality

$$\frac{d\langle V \rangle}{dt} < k_{max} - \frac{\langle f(\tau) \rangle \langle V \rangle}{2}. \quad (21)$$

Since at steady state

$$\langle f(\tau) \rangle = \frac{1}{T_i}, \quad (22)$$

[41], (21) implies (17). From (19), the time evolution of the  $l^{\text{th}}$  order moment is obtained as

$$\frac{d\langle V^l \rangle}{dt} = \langle l \alpha(V) V^l \rangle - \langle f(\tau) V^l \rangle \langle 1 - \beta^l \rangle, \quad (23)$$

which as before, using (15) can be reduced to the inequality

$$\frac{d\langle V^l \rangle}{dt} < l k_{max} \langle V^{l-1} \rangle - \langle f(\tau) \rangle \langle V^l \rangle \langle 1 - \beta^l \rangle. \quad (24)$$

Using (22), the above inequality implies (34). ■

An extreme example of size-dependent growth is when  $\alpha$  becomes inversely proportional to size. In this case  $\dot{V}$  in (13) is constant, and corresponds to cells growing linearly in size as, as experimentally reported for some organisms [37], [42]. For this case, the result below provides exact closed-form expressions for the first and second-order statistical moments of  $V$ .

**Theorem 3:** Let the growth rate be given as

$$\alpha(V) = \frac{k_{max}}{V}, \quad (25)$$

and corresponds to the following SHS continuous dynamics

$$\dot{V} = k_{max}, \quad \dot{\tau} = 1. \quad (26)$$

Then, the steady-state mean and coefficient of variation squared of  $V(t)$  is given by

$$\lim_{t \rightarrow \infty} \langle V(t) \rangle = \frac{k_{max} \langle T_i \rangle (3 + CV_{T_i}^2)}{2} \quad (27)$$

$$\begin{aligned} CV_V^2 &= \frac{1}{27} + \frac{4 \left( 9 \frac{\langle T_i^3 \rangle}{\langle T_i \rangle^3} - 9 - 6 CV_{T_i}^2 - 7 CV_{T_i}^4 \right)}{27 (3 + CV_{T_i}^2)^2} \\ &+ \frac{16 CV_\beta^2}{3(3 - CV_\beta^2)(3 + CV_{T_i}^2)}, \end{aligned} \quad (28)$$

where  $CV_{T_i}^2$  and  $CV_\beta^2$  denote randomness in the inter-division times ( $T_i$ ) and partitioning errors ( $\beta$ ), respectively, as quantified by their coefficient of variation squared. ■

**Proof of Theorem 3:** Due to space limitations we omit the proof of this Theorem. We refer interested readers to [43], [44] where we analyzed a similar systems. More

specifically, in [43] we considered linear accumulation of protein molecules inside a cell, and cell division events occurs at times  $T_i$  that follow a general class of distributions. Moreover, whenever the event occurs, proteins are partitioned among daughter cells based on a binomial distribution. The key difference between this theorem and [43] lies in the stochastic reset that is activated at the time of division: here, volume is reset via (3), while in [43] the state variable (protein copy number) is reset based on a binomial distribution. ■

Interestingly, that the mean cell size in (27) not only depends on the mean inter-division times  $\langle T_i \rangle$ , but also on its second-order moment  $CV_{T_i}^2$ . Thus, making the cell division times more random (i.e., increasing  $CV_{T_i}^2$ ) will also lead to larger cells on average. Moreover, (28) shows that the magnitude of fluctuations in cell size ( $CV_V^2$ ) depend on  $T_i$  through its moments up to order three. Note that if  $CV_\beta^2 = 0$  (no partitioning errors) and inter-division times approach their deterministic limit (i.e.,  $T_i$  approaches a delta distribution  $T_i = \langle T_i \rangle$  with probability one), then

$$CV_V^2 \rightarrow \frac{1}{27}. \quad (29)$$

This non-zero value for  $CV_V^2$  in the limit of vanishing noise sources represent variability in size from cells being in different stages of the deterministic cell cycle (i.e., some cells have just been born while others are close to division). Our result also allows for decomposing  $CV_V^2$  into biologically meaningful terms representing contributions from different noise sources. The terms from left to right in the right-hand side of (28), terms from left to right in (28) represent contributions to  $CV_V^2$  from i) Deterministic cell-cycle and ii) Random timing of division events and iii) Partitioning errors at the time of division. If fluctuations in  $T_i$  around  $\langle T_i \rangle$  are small, then using Taylor series

$$\langle T_i^3 \rangle / \langle T_i \rangle^3 \approx 1 + 3CV_{T_i}^2. \quad (30)$$

Substituting (30) in (28) and ignoring  $CV_{T_i}^4$  and higher order terms yields

$$CV_V^2 \approx \frac{1}{27} + \frac{28CV_{T_i}^2}{81} + \frac{16CV_\beta^2}{3(3 - CV_\beta^2)(3 + CV_{T_i}^2)}. \quad (31)$$

It is important to point out that since  $\beta$  follows a beta distribution with mean  $\langle \beta \rangle = 1/2$ ,  $CV_\beta^2 < 1$  in (28) and (31). This constraint implies that  $CV_V^2$  always decreases with increasing  $CV_{T_i}^2$ , even though the last term in (31) is inversely related to  $CV_{T_i}^2$ .

In summary, our result show that appropriate regulation of growth rate by size (as seen in mammalian cells) can be an effective mechanism for achieving size homeostasis. We next consider a different class of models where size-based regulation is at the level division rather than growth.

#### IV. CONSTANT GROWTH RATE AND SIZE-DEPENDENT DIVISION

Single cell observations in many different bacterial species indicate exponential growth (i.e., constant  $\alpha$ ) in between divi-

sion events [45]–[47]. For such organisms, a size-dependent division rate is essential for maintaining size homeostasis. Towards that end, consider the following SHS continuous dynamics with constant growth rate

$$\dot{V} = \alpha V, \quad \dot{\tau} = 1, \quad (32)$$

with the probability that a cell division event will occur in the next infinitesimal time interval  $(t, t + dt)$  given by  $f(V)dt$ , where  $f$  is now a monotonically increasing function of  $V$ . The theorem below give sufficient conditions on  $f$  for size homeostasis.

**Theorem 4:** *Let there exist constants  $k > 0$  and  $p > 0$  such that*

$$f(V) \geq kV^p, \quad \forall V \geq 0 \quad (33)$$

and  $f_0 := \lim_{V \rightarrow 0} f(V) < 2\alpha$ , then for the SHS given by (32) and (3)

$$0 < \lim_{t \rightarrow \infty} \langle V^l(t) \rangle < \left( \frac{l\alpha}{k(1 - \langle \beta^l \rangle)} \right)^{\frac{l}{p}} \quad (34)$$

where  $l \in \{1, 2, \dots\}$ . ■

**Proof of Theorem 4:** Consider a newborn cell with *sufficiently small* size at time  $t = 0$ . Then, its division rate is a constant  $f_0$  and the time to division is exponentially distributed with mean  $1/f_0$ . Based on Theorem 1, the mean size will grow over successive generations (and not go extinct) for a constant growth rate iff

$$\left\langle e^{\int_{y=0}^{T_i} \alpha(y) dy} \right\rangle = \langle e^{\alpha T_i} \rangle > 2. \quad (35)$$

Using an exponentially distributed  $T_i$  with mean  $1/f_0$  in the above inequality yields  $f_0 < 2\alpha$ , which is the necessary and sufficient condition for preventing cell size to go extinct. The time evolution of moments is given by

$$\begin{aligned} \frac{d\langle V^l \rangle}{dt} &= \langle l\alpha V^l \rangle - \langle f(V)V^l \rangle \langle 1 - \beta^l \rangle \\ &\leq l\alpha \langle V^l \rangle - k \langle V^{l+p} \rangle \langle 1 - \beta^l \rangle \\ &\leq l\alpha \langle V^l \rangle - k \langle V^l \rangle^{1+\frac{p}{l}} \langle 1 - \beta^l \rangle, \end{aligned} \quad (36)$$

which implies (34) and ensures boundedness of all moments. ■

##### A. The Sizer strategy

Next we analyze in detail a common example of size-dependent division, that has been referred to in the literature as the “sizer strategy” [48]–[50]. In this case, cells sense how big they are and divide when they reach a critical size threshold. Such as strategy can be implemented by choosing

$$f(V) = \left( \frac{V}{\bar{V}} \right)^p \quad (37)$$

where  $\bar{V}$  is a positive constant and  $p$  is a positive integer. A large enough  $p$  corresponds to division events occurring when cell size reaches a critical threshold  $\bar{V}$ . Below, we show



how closure schemes can be used to get approximate formalisms for the moments.

Using Dynkin's formula for the SHS defined by (32) and (37) results in the following moment dynamics

$$\frac{d\langle V^l \rangle}{dt} = l\alpha \langle V^l \rangle + \bar{V}^{-p} \langle (\beta - 1)^l \rangle \langle V^{l+p} \rangle. \quad (38)$$

Let

$$\mu = [\langle V \rangle, \langle V^2 \rangle, \dots, \langle V^L \rangle]^T \quad (39)$$

be a vector of moments up to order  $L$ . We refer to  $L$  as the *order of truncation* for the moment dynamics. Using (38), the time evolution of  $\mu$  can be compactly written as

$$\frac{d\mu}{dt} = a + A\mu + C\bar{\mu} \quad (40)$$

for some vector  $a$ , matrices  $A$  and  $C$  that are dependent on model parameters, and

$$\bar{\mu} = [\langle V^{L+1} \rangle, \dots, \langle V^{L+p} \rangle]^T \quad (41)$$

is the vector of higher order moments. Note that nonlinearities in the stochastic systems lead to the well known problem of closure, where time evolution of lower order moments  $\mu$  depends on higher-order moments  $\bar{\mu}$ . To solve (40), we use moment closure techniques that express

$$\bar{\mu} \approx \theta(\mu). \quad (42)$$

### B. Moment closure approximation

Using the closure (42), yields the following approximate moment dynamics

$$\frac{d\mu}{dt} \approx a + A\mu + C\theta(\mu). \quad (43)$$

While various techniques are available to construct functions  $\theta$  [51]–[54], we use recently proposed derivative-matching methods to close moment equations [17], [55]. For example, consider  $L = 2$  in (39) (second order of truncation) and  $p = 2$ , then the higher-order moments are given by

$$\bar{\mu} = [\langle V^3 \rangle, \langle V^4 \rangle]^T. \quad (44)$$

Based on derivative-matching, these higher-order moments can be approximated in terms of lower-order moments as

$$\bar{\mu} \approx \left[ \frac{\langle V^2 \rangle^3}{\langle V \rangle^3}, \frac{\langle V^2 \rangle^6}{\langle V \rangle^8} \right]^T \quad (45)$$

[17], [55]. It turns out that the closed moment equations (43) corresponding to  $L = 2$  and derivative-matching closure yield analytical expressions for the steady-state moments for any integer  $p$  in (37). In particular, the steady-state mean and coefficient of variation squared of cell size is given by

$$\langle V \rangle \approx \alpha^{\frac{1}{p}} \bar{V} \langle \beta \rangle^{-\frac{3+p}{2p}} \left( \langle \beta \rangle - 1/2 \langle \beta \rangle^2 CV_{\beta}^2 - 1/2 \langle \beta \rangle^2 \right)^{\frac{1+p}{2p}} \quad (46)$$

$$CV_V^2 \approx \left( \frac{2}{2 - \langle \beta \rangle CV_{\beta}^2 - \langle \beta \rangle} \right)^{\frac{1}{p}} - 1, \quad (47)$$

respectively. For symmetric division ( $\langle \beta \rangle = 1/2$ ), above equations reduce to

$$\langle V \rangle \approx 2^{\frac{1}{p}} \alpha^{\frac{1}{p}} \bar{V} \left( \frac{3 - CV_{\beta}^2}{4} \right)^{\frac{p+1}{2p}} \quad (48)$$

$$CV_V^2 \approx \left( \frac{4}{3 - CV_{\beta}^2} \right)^{\frac{1}{p}} - 1. \quad (49)$$

These results qualitatively reproduce the behavior (as  $p$  increase, noise in volume decrease) seen from computationally expensive Monte Carlo simulations of the SHS (Fig. 2).

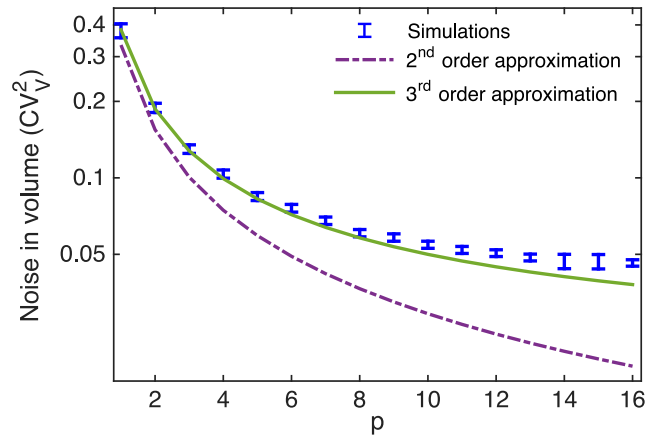

Fig. 2. Noise in the cell size (measured by the coefficient of variation squared) as a function of the parameter  $p$  for division rate given by (37). Comparisons are shown between results obtained via Monte Carlo simulations and using closed moment equation (43) corresponding to 2<sup>nd</sup> and 3<sup>rd</sup> order truncation. While the qualitative behavior is similar, increasing the order of truncation leads to a better quantitative match to results obtained from Monte Carlo simulations. Partitioning noise is assumed to be zero.

Intriguingly, (48)-(49) show that the mean cell size is affected by  $CV_{\beta}^2$  (magnitude of error in partitioning of volume between daughter cells): larger partitioning errors decrease the average cell size, but increase  $CV_V^2$  (see Fig. 3). Another novel insight from (49) is that  $CV_V^2$  is independent of cell growth rate ( $\alpha$ ) and cell size threshold  $\bar{V}$ . Indeed, computing  $CV_V^2$  from Monte Carlo simulation results in the exact same noise curve as in Fig. 2 for different values of  $\alpha$  and  $\bar{V}$ .

### V. CONSTANT GROWTH RATE, SIZE AND TIMER DEPENDENT DIVISION

In this section, we consider a constant growth rate (as in the previous section) but with division rates  $f(V, \tau)$  that take information from both size and cell-cycle clock. Before providing an examples of this form of regulation, we briefly discuss sufficient condition on  $f(V, \tau)$  for size homeostasis.

For a sufficient small cell size, division rate is given by  $f_0(\tau) := \lim_{V \rightarrow 0} f(\tau, V)$ . Then from Theorem 1, a necessary and sufficient condition for cell size to not go extinct is

$$\langle e^{\alpha T_i} \rangle > 2 \quad (50)$$

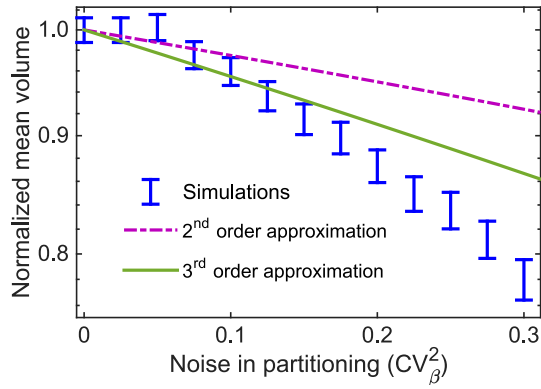

Fig. 3. Mean cell size decreases with increasing noise in partitioning ( $CV_\beta^2$ ). Average size obtained by running a large number of Monte Carlo simulations is shown together with corresponding solutions obtained from closed moment equations for 2<sup>nd</sup> and 3<sup>rd</sup> order truncation. Mean cell size was normalized by the average size in the case of zero noise in partitioning ( $CV_\beta^2 = 0$ ). Parameters used were  $\alpha = 0.05 \text{ min}^{-1}$ ,  $\bar{V} = 2.5 \text{ } \mu\text{m}$ , and  $p = 2$ .

where the distribution of  $T_i$  is given by (4) with  $f$  replaced by  $f_0$ . Moreover, a sufficient condition that ensures moments of  $V$  remain bounded is

$$f(\tau, V) \geq k\tau^{p_1} V^{p_2}, \quad \forall V \geq 0, \quad \forall \tau \geq 0 \quad (51)$$

for some positive constants  $k$ ,  $p_1$  and  $p_2$ . Given the space constraints we omit the proof of this result. Next, we analyze in detail a recently uncovered size homeostasis strategy, where the division rate is a function of both size and cell-cycle clock.

#### A. The Adder strategy

Recent observations is many bacterial species have found that timing of cell divisions are regulated so as to add a fixed size from cell birth to division [21], [25], [27], [28], [56]–[59]. Since cell size grows exponentially (i.e., constant  $\alpha$ ), at any given time  $t$  the size added since birth would be given by

$$\Delta V = V(t) (1 - \exp\{-\alpha\tau\}) \quad (52)$$

which is determined by both  $V$  and  $\tau$ . As per this “adder strategy”, division is triggered when  $\Delta V$  reaches a threshold. Below, we discuss how this “adder strategy” is implemented and perform a stochastic analysis of the model using closure techniques.

A molecular implementation of the adder model was proposed by [26], [57], [60] and shown in Fig. 4. It consists of a time-keeper protein with level  $M$  that is produced at a rate proportional to size. The continuous dynamics is now given by

$$\dot{V} = \alpha V, \quad \dot{M} = kV, \quad (53)$$

where  $k$  is a positive proportionality constant. Cell division event occurs when  $M(t)$  reaches a threshold  $\bar{M}$ , and whenever the event occurs state variables are reset as

$$V \mapsto \beta V, \quad M \mapsto 0. \quad (54)$$

Based on this formulation the volume added between two division events will be fixed and given by

$$\Delta V = \frac{\alpha \bar{M}}{k} \quad (55)$$

[26]. To practically implement the “adder strategy” we consider the SHS (53)-(54) with a division rate

$$f(M) = \left(\frac{M}{\bar{M}}\right)^p \quad (56)$$

for a positive integer  $p$ , where large enough  $p$  would correspond to division occurring when  $M(t) = \bar{M}$ . We next explore the moment dynamics of this systems using closure schemes.

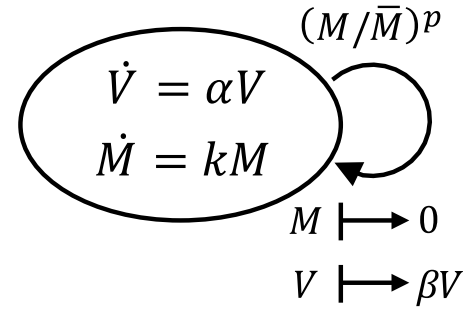

Fig. 4. SHS representation of a molecular implementation of the adder strategy. A time-keeper protein ( $M$ ) is produced at a rate proportion to size, an division is triggered when  $M$  reached a threshold  $\bar{M}$ . Just after division, the protein is fully degraded. Based on the implementation, the size added between two successive events is constant and given by (52).

#### B. Moment closure approximation

For the SHS (53)-(54), the time evolution of the statistical moments is obtained as

$$\begin{aligned} \frac{d\langle V^l M^n \rangle}{dt} &= \alpha l \langle V^l M^n \rangle \\ &\quad + nk \langle V^{l+1} M^{n-1} \rangle - \bar{M}^{-p} \langle V^l M^{n+p} \rangle \\ \frac{d\langle V^l \rangle}{dt} &= \alpha l \langle V^l \rangle - \bar{M}^{-p} \langle (\beta - 1)^l \rangle \langle V^l M^p \rangle \end{aligned} \quad (57)$$

for  $l, n \in \{0, 1, 2, \dots\}$ . The moment equations can be closed using derivative-matching technique, which expresses any higher-order moment as

$$\begin{aligned} \langle V^l M^{n+p} \rangle &\approx \langle V^2 \rangle^{\frac{1}{2}(l-1)l} \langle M^2 \rangle^{\frac{1}{2}(n+p-1)(n+p)} \\ &\quad \langle M \rangle^{-(n+p)(l+n+p-2)} \langle V \rangle^{-l(l+n+p-2)} \\ &\quad \langle VM \rangle^{l(n+p)} \end{aligned} \quad (58)$$

in terms of moments of order up to two [55]. Closing the moment dynamics of first and second order moments (i.e., second order truncations) yields the following steady-state mean and noise levels for cell size

$$\langle V \rangle \approx \frac{\alpha^{\frac{p+1}{p}} \bar{M} \left( 2k \langle \beta \rangle - k \langle \beta \rangle^2 CV_\beta^2 - k \langle \beta \rangle^2 \right)^{\frac{2p+1}{2p}}}{2^{\frac{p+1}{2p}} k^{\frac{2p+3}{2p}} \langle \beta \rangle^{\frac{4p+3}{2p}}} \quad (59)$$

$$\begin{aligned}
 CV_V^2 &\approx 2^{\frac{1}{p}} \langle \beta \rangle^{\frac{p+1}{p}} \\
 &\left( 2 \langle \beta \rangle - \langle \beta \rangle^2 CV_\beta^2 - \langle \beta \rangle^2 \right)^{-\frac{p+1}{p}} \\
 &\left( 2 - \langle \beta \rangle^{\frac{p}{p+1}} \left( 2 \langle \beta \rangle - \langle \beta \rangle^2 CV_\beta^2 - \langle \beta \rangle^2 \right)^{\frac{1}{p+1}} \right) \\
 &- 1. \tag{60}
 \end{aligned}$$

In the case of symmetric division ( $\langle \beta \rangle = 1/2$ ), these equations reduces to

$$\langle V \rangle \approx \frac{\alpha^{\frac{1}{p}+1} \bar{M} (3 - CV_\beta^2)^{\frac{1}{2p}+1}}{\sqrt{2}k} \tag{61}$$

$$CV_V^2 \approx \left( 1 - \frac{1}{4} \left( \frac{3 - CV_\beta^2}{2} \right)^{\frac{1}{p+1}} \right) \left( \frac{3 - CV_\beta^2}{4} \right)^{-\frac{p+1}{p}} - 1. \tag{62}$$

Above results show that as observed earlier, increasing partitioning errors will lead to smaller mean cell size but larger noise. Moreover,  $CV_V^2$  monotonically decreasing with increasing  $p$  consistent with results from Monte Carlo simulation (Fig. 5). A comparison of Fig. 3 and 5 also reveal that for a given value of  $p$ , the adder provides lesser noise in size compared to the sizer. Finally, equation (60) shows that  $CV_V^2$  is independent of cell growth rate ( $\alpha$ ), and parameters  $k$  and  $\bar{M}$ .

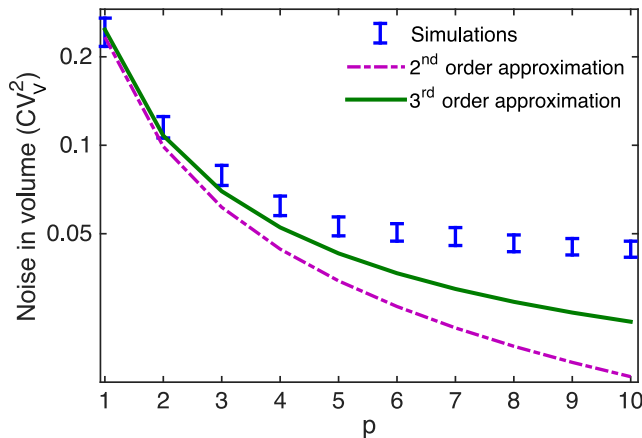

Fig. 5. Noise in the cell size (measured by the coefficient of variation squared) as a function of the parameter  $p$  in Fig. 3.  $CV_V^2$  decreases with increasing  $p$  as illustrated by Monte Carlo simulations and solutions of closed moment equations based on a 2<sup>nd</sup> and 3<sup>rd</sup> order truncation. Increasing the order of truncation results in a better match with Monte Carlo simulations.

## VI. CONCLUSION

Here we have used a SHS framework to model time evolution of size of a single cell undergoing cycles of growth and division. Our goal was to uncover mechanisms responsible for size homeostasis, i.e., ensuring a tight distribution of cell size. The model is defined by three features: a growth rate  $\alpha(V, \tau)$ , a division rate  $f(V, \tau)$ , and a random variable  $\beta \in (0, 1)$  that determines the reduction in size when division occurs. Results show that growth/division rates that only depend on the cell-cycle clock  $\tau$  are not physiologically, since they lead to unboundedly increasing cell size variance

(Theorem 1). The key contribution of this work is to identify sufficient conditions on growth/division rates that prevent extinction of cell size (i.e.,  $\langle V \rangle \rightarrow 0$  as  $t \rightarrow \infty$ ) and also lead to bounded cell size variance (Theorems 2-4).

We also analyzed two commonly used models for size homeostasis: the sizer (cell division occurs at a critical size) and the adder (cell division occurs after adding a critical size from cell birth). Interestingly, closure techniques were shown to yield approximate analytical formulas for the first and second order moments of cell size. These formulas reveal a novel result that increasing degree of partitioning errors  $CV_\beta^2$  in these models leads to smaller cells on average and higher noise in cell size  $CV_V^2$ . Moreover, for many parameter regimes the adder strategy was found to result in a lower  $CV_V^2$  than the sizer.

In summary, theoretical tools for SHS can provide fundamental understandings of regulatory mechanisms maintaining size homeostasis. Future work will focus on developing computational tools for inferring the growth and division rate functions from single-cell measurements of cell size over many generations. It will be interesting to apply these tools to data, and infer these functions in the context of different biological organisms.

## ACKNOWLEDGMENT

AS is supported by the National Science Foundation Grant DMS-1312926.

## REFERENCES

- [1] Y. Xu and J. P. Hespanha, "Optimal Communication Logics for Networked Control Systems," in *Proc. of the 43rd Conf. on Decision and Contr.*, 2004.
- [2] S. Bohacek, J. P. Hespanha, J. Lee, and K. Obraczka, "A hybrid systems modeling framework for fast and accurate simulation of data communication networks," in *Proc. of the ACM Int. Conf. on Measurements and Modeling of Computer Systems (SIGMETRICS)*, vol. 31, 2003, pp. 58–69.
- [3] J. Hu, "Application of stochastic hybrid systems in power management of streaming data," in *Proc. of the 2006 Amer. Control Conference, Minneapolis, MN*, 2006, pp. 4754–4759.
- [4] A. Singh and J. Hespanha, "Stochastic Analysis of Gene Regulatory Networks Using Moment Closure," in *American Control Conference*, 2007, pp. 1299–1304.
- [5] M. Strelec, K. Macek, and A. Abate, "Modeling and simulation of a microgrid as a stochastic hybrid system," in *3rd IEEE PES International Conference and Exhibition on Innovative Smart Grid Technologies (ISGT Europe)*, 2012, pp. 1–9.
- [6] A. David, D. Du, K. Larsen, M. Mikuionis, and A. Skou, "An evaluation framework for energy aware buildings using statistical model checking," *Science China Information Sciences*, vol. 55, pp. 2694–2707, 2012.
- [7] A. R. Teel, A. Subbaraman, and A. Sferlazza, "Stability analysis for stochastic hybrid systems: A survey," *Automatica*, vol. 50, no. 10, pp. 2435–2456, 2014.
- [8] A. Visintini, W. Glover, J. Lygeros, and J. Maciejowski, "Monte carlo optimization for conflict resolution in air traffic control," *IEEE Transactions on Intelligent Transportation Systems*, vol. 7, pp. 470–482, 2006.
- [9] W. Liu and I. Hwang, "Stochastic hybrid system model with applications to aircraft trajectory prediction and conflict detection," *AIAA Journal on Guidance, Dynamics and Control*, vol. 34, 2011.
- [10] J. P. Hespanha, "Modeling and analysis of networked control systems using stochastic hybrid systems," *Annual Reviews in Control*, vol. 38, pp. 155–170, 2014.

- [11] J. Hu, W.-C. Wu, and S. Sastry, "Modeling Subtilin Production in *Bacillus subtilis* Using Stochastic Hybrid Systems," in *Hybrid Systems: Computation and Control*, ser. Lecture Notes in Computer Science, R. Alur and G. J. Pappas, Eds. Springer Berlin Heidelberg, 2004, pp. 417–431.
- [12] J. P. Hespanha and A. Singh, "Stochastic models for chemically reacting systems using polynomial stochastic hybrid systems," *International Journal of Robust and Nonlinear Control*, vol. 15, pp. 669–689, 2005.
- [13] A. Singh and J. Hespanha, "Models for Multi-Species Chemical Reactions Using Polynomial Stochastic Hybrid Systems," in *44th IEEE Conference on Decision and Control, 2005 and 2005 European Control Conference. CDC-ECC '05*, 2005, pp. 2969–2974.
- [14] H. El-Samad, M. Fazel, X. Liu, A. Papachristodoulou, and S. Prajna, "Stochastic reachability analysis in complex biological networks," in *American Control Conference*, 2006, pp. 6 pp.–.
- [15] A. A. Julius, A. Halasz, M. S. Sakar, H. Rubin, V. Kumar, and G. J. Pappas, "Stochastic Modeling and Control of Biological Systems: The Lactose Regulation System of *Escherichia Coli*," *IEEE Transactions on Automatic Control*, vol. 53, pp. 51–65, 2008.
- [16] D. Riley, X. Koutsoukos, and K. Riley, "Modelling and analysis of the sugar cataract development process using stochastic hybrid systems," *Systems Biology, IET*, vol. 3, pp. 137–154, 2009.
- [17] A. Singh and J. P. Hespanha, "Stochastic hybrid systems for studying biochemical processes," *Philosophical Transactions of the Royal Society of London A: Mathematical, Physical and Engineering Sciences*, vol. 368, pp. 4995–5011, 2010.
- [18] B. J. Daigle, M. Soltani, L. R. Petzold, and A. Singh, "Inferring Single-Cell Gene Expression Mechanisms using Stochastic Simulation," *Bioinformatics*, 2015.
- [19] A. Tzur, R. Kafri, V. S. LeBleu, G. Lahav, and M. W. Kirschner, "Cell Growth and Size Homeostasis in Proliferating Animal Cells," *Science*, vol. 325, pp. 167–171, 2009.
- [20] A. C. Lloyd, "The Regulation of Cell Size," *Cell*, vol. 154, pp. 1194–1205, 2013.
- [21] M. Campos, I. V. Surovtsev, S. Kato, A. Paintdakhi, B. Beltran, S. E. Ebmeier, and C. Jacobs-Wagner, "A Constant Size Extension Drives Bacterial Cell Size Homeostasis," *Cell*, vol. 159, pp. 1433–1446, 2014.
- [22] D. J. Kiviet, P. Nghe, N. Walker, S. Boulineau, V. Sunderlikova, and S. J. Tans, "Stochasticity of metabolism and growth at the single-cell level," *Nature*, vol. 514, pp. 376–379, 2014.
- [23] L. Robert, M. Hoffmann, N. Krell, S. Aymerich, J. Robert, and M. Doumic, "Division in *Escherichia coli* is triggered by a size-sensing rather than a timing mechanism," *BMC Biology*, vol. 12, p. 17, 2014.
- [24] K. M. Schmoller and J. M. Skotheim, "The Biosynthetic Basis of Cell Size Control," *Trends in Cell Biology*, 2015.
- [25] M. Deforet, D. van Ditmarsch, and J. B. Xavier, "Cell-Size Homeostasis and the Incremental Rule in a Bacterial Pathogen," *Biophysical Journal*, vol. 109, pp. 521–528, 2015.
- [26] K. R. Ghusinga, C. A. Vargas-Garcia, and A. Singh, "A mechanistic first-passage time framework for bacterial cell-division timing," *arXiv:1512.07864 [q-bio]*, 2015.
- [27] S. Jun and S. Taheri-Araghi, "Cell-size maintenance: universal strategy revealed," *Trends in Microbiology*, vol. 23, pp. 4–6, 2015.
- [28] S. Taheri-Araghi, S. Bradde, J. T. Sauls, N. S. Hill, P. A. Levin, J. Paulsson, M. Vergassola, and S. Jun, "Cell-Size Control and Homeostasis in Bacteria," *Current Biology*, 2015.
- [29] Y. Tanouchi, A. Pai, H. Park, S. Huang, R. Stamatov, N. E. Buchler, and L. You, "A noisy linear map underlies oscillations in cell size and gene expression in bacteria," *Nature*, vol. advance online publication, 2015.
- [30] A. Zaritsky and C. L. Woldringh, "Chromosome replication, cell growth, division and shape: a personal perspective," *Microbial Physiology and Metabolism*, p. 756, 2015.
- [31] A. Zaritsky, "Cell-Shape Homeostasis in *Escherichia coli* Is Driven by Growth, Division, and Nucleoid Complexity," *Biophysical Journal*, vol. 109, pp. 178–181, 2015.
- [32] J. T. Sauls, D. Li, and S. Jun, "Adder and a coarse-grained approach to cell size homeostasis in bacteria," *Current Opinion in Cell Biology*, vol. 38, pp. 38–44, 2016.
- [33] S.-C. Fang, C. de los Reyes, and J. G. Umen, "Cell size checkpoint control by the retinoblastoma tumor suppressor pathway," *PLoS genetics*, vol. 2, p. e167, 2006.
- [34] F. R. Cross and J. G. Umen, "The *Chlamydomonas* cell cycle," *The Plant Journal: For Cell and Molecular Biology*, vol. 82, pp. 370–392, 2015.
- [35] Y. Zegman, D. Bonazzi, and N. Minc, "Measurement and manipulation of cell size parameters in fission yeast," *Methods in Cell Biology*, vol. 125, pp. 423–436, 2015.
- [36] A. Tzur, R. Kafri, V. S. LeBleu, G. Lahav, and M. W. Kirschner, "Cell Growth and Size Homeostasis in Proliferating Animal Cells," *Science*, vol. 325, pp. 167–171, 2009.
- [37] M. B. Ginzberg, R. Kafri, and M. Kirschner, "On being the right (cell) size," *Science*, vol. 348, p. 1245075, 2015.
- [38] S. M. Ross, "Reliability theory," in *Introduction to Probability Models*, 10th ed. Academic Press, 2010, pp. 579 – 629.
- [39] R. Kafri, J. Levy, M. B. Ginzberg, S. Oh, G. Lahav, and M. W. Kirschner, "Dynamics extracted from fixed cells reveal feedback linking cell growth to cell cycle," *Nature*, vol. 494, pp. 480–483, 2013.
- [40] J. P. Hespanha and A. Singh, "Stochastic models for chemically reacting systems using polynomial stochastic hybrid systems," *International Journal of Robust and Nonlinear Control*, vol. 15, pp. 669–689, 2005.
- [41] *Failure Rate Modelling for Reliability and Risk*. London: Springer London, 2008, ch. Failure Rate and Mean Remaining Lifetime, pp. 9–44.
- [42] I. Conlon and M. Raff, "Differences in the way a mammalian cell and yeast cells coordinate cell growth and cell-cycle progression," *Journal of Biology*, vol. 2, p. 7, 2003.
- [43] M. Soltani, C. A. Vargas-Garcia, D. Antunes, and A. Singh, "Decomposing variability in protein levels from noisy expression, genome duplication and partitioning errors during cell-divisions," *bioRxiv*, p. 026559, 2015.
- [44] D. Antunes and A. Singh, "Quantifying gene expression variability arising from randomness in cell division times," *Journal of Mathematical Biology*, vol. 71, pp. 437–463, 2014.
- [45] S. Cooper, "Distinguishing between linear and exponential cell growth during the division cycle: Single-cell studies, cell-culture studies, and the object of cell-cycle research," *Theoretical Biology and Medical Modelling*, vol. 3, p. 10, 2006.
- [46] —, "Schizosaccharomyces pombe grows exponentially during the division cycle with no rate change points," *FEMS Yeast Research*, vol. 13, pp. 650–658, 2013.
- [47] M. H. Rahman, M. R. Ahmad, M. Takeuchi, M. Nakajima, Y. Hasegawa, and T. Fukuda, "Single Cell Mass Measurement Using Drag Force Inside Lab-on-Chip Microfluidics System," *IEEE Transactions on NanoBioscience*, vol. 14, pp. 927–934, 2015.
- [48] J. J. Tyson and O. Diekmann, "Sloppy size control of the cell division cycle," *Journal of Theoretical Biology*, vol. 118, pp. 405–426, 1986.
- [49] J. J. Turner, J. C. Ewald, and J. M. Skotheim, "Cell Size Control in Yeast," *Current Biology*, vol. 22, pp. R350–R359, 2012.
- [50] K. Z. Pan, T. E. Saunders, I. Flor-Parra, M. Howard, and F. Chang, "Cortical regulation of cell size by a sizer *cdr2p*," *eLife*, vol. 3, p. e02040, 2014.
- [51] A. Singh and J. Hespanha, "Moment closure techniques for stochastic models in population biology," in *American Control Conference*, 2006, pp. 6 pp.–.
- [52] J. Hespanha, "Moment closure for biochemical networks," in *Communications, Control and Signal Processing, 2008.3rd International Symposium on*. IEEE, 2008, pp. 142–147.
- [53] C. Gillespie, "Moment-closure approximations for mass-action models," *IET Systems Biology*, vol. 3, pp. 52–58, 2009.
- [54] C. H. Lee, K. Kim, and P. Kim, "A moment closure method for stochastic reaction networks," *J. of Chemical Physics*, vol. 130, p. 134107, 2009.
- [55] A. Singh and J. P. Hespanha, "A Derivative Matching Approach to Moment Closure for the Stochastic Logistic Model," *Bulletin of Mathematical Biology*, vol. 69, pp. 1909–1925, 2007.
- [56] W. J. Voorn and L. J. H. Koppes, "Skew or third moment of bacterial generation times," *Archives of microbiology*, vol. 169, pp. 43–51, 1997.
- [57] A. Amir, "Cell Size Regulation in Bacteria," *Physical Review Letters*, vol. 112, p. 208102, 2014.
- [58] I. Soifer, L. Robert, N. Barkai, and A. Amir, "Single-cell analysis of growth in budding yeast and bacteria reveals a common size regulation strategy," *arXiv:1410.4771 [cond-mat, q-bio]*, 2014.
- [59] A. Fievet, A. Ducret, T. Mignot, O. Valette, L. Robert, R. Pardoux, A. R. Dolla, and C. Aubert, "Single-cell analysis of growth and cell division of the anaerobe *Desulfovibrio vulgaris* Hildenborough," *Microbial Physiology and Metabolism*, vol. 6, p. 1378, 2015.
- [60] L. Sompayrac and O. Maaløe, "Autorepressor Model for Control of DNA Replication," *Nature*, vol. 241, pp. 133–135, 1973.
